# Supplementary material for: Adipose tissue and skeletal muscle wasting precede clinical diagnosis of pancreatic cancer
Source: PubMed Central journal article supplement (PMC10354105; doi:10.1038/s41467-023-40024-3), 2023-07-18
Supplement: 41467_2023_40024_MOESM3_ESM.pdf [file 41467_2023_40024_MOESM3_ESM.pdf]

## Reporting Summary

Nature Portfolio wishes to improve the reproducibility of the work that we publish. This form provides structure for consistency and transparency in reporting. For further information on Nature Portfolio policies, see our [Editorial Policies](#) and the [Editorial Policy Checklist](#).

### Statistics

For all statistical analyses, confirm that the following items are present in the figure legend, table legend, main text, or Methods section.

n/a Confirmed

- The exact sample size ( $n$ ) for each experimental group/condition, given as a discrete number and unit of measurement
- A statement on whether measurements were taken from distinct samples or whether the same sample was measured repeatedly
- The statistical test(s) used AND whether they are one- or two-sided  
*Only common tests should be described solely by name; describe more complex techniques in the Methods section.*
- A description of all covariates tested
- A description of any assumptions or corrections, such as tests of normality and adjustment for multiple comparisons
- A full description of the statistical parameters including central tendency (e.g. means) or other basic estimates (e.g. regression coefficient) AND variation (e.g. standard deviation) or associated estimates of uncertainty (e.g. confidence intervals)
- For null hypothesis testing, the test statistic (e.g.  $F$ ,  $t$ ,  $r$ ) with confidence intervals, effect sizes, degrees of freedom and  $P$  value noted  
*Give  $P$  values as exact values whenever suitable.*
- For Bayesian analysis, information on the choice of priors and Markov chain Monte Carlo settings
- For hierarchical and complex designs, identification of the appropriate level for tests and full reporting of outcomes
- Estimates of effect sizes (e.g. Cohen's  $d$ , Pearson's  $r$ ), indicating how they were calculated

*Our web collection on [statistics for biologists](#) contains articles on many of the points above.*

### Software and code

Policy information about [availability of computer code](#)

Data collection

Data analysis

For manuscripts utilizing custom algorithms or software that are central to the research but not yet described in published literature, software must be made available to editors and reviewers. We strongly encourage code deposition in a community repository (e.g. GitHub). See the Nature Portfolio [guidelines for submitting code & software](#) for further information.

### Data

Policy information about [availability of data](#)

All manuscripts must include a [data availability statement](#). This statement should provide the following information, where applicable:

- Accession codes, unique identifiers, or web links for publicly available datasets
- A description of any restrictions on data availability
- For clinical datasets or third party data, please ensure that the statement adheres to our [policy](#)

The raw clinical and imaging data from DFCI/MGB patients are protected and are not available due to data privacy laws. Deidentified data can be obtained from the corresponding author with appropriate IRB approval and inter-institutional data use agreement. The KPNC data are available under restricted access because use was authorized by the KPNC IRB with a waiver of informed consent for this specific study. Access can be obtained by contacting the KPNC research team for review and application for a new IRB approval of a waiver. Processed data used to generate figures has been provided in the Source Data file.

## Research involving human participants, their data, or biological material

Policy information about studies with [human participants or human data](#). See also policy information about [sex, gender \(identity/presentation\), and sexual orientation](#) and [race, ethnicity and racism](#).

|                                                                    |                                                                                                                                                                                                                                   |
|--------------------------------------------------------------------|-----------------------------------------------------------------------------------------------------------------------------------------------------------------------------------------------------------------------------------|
| Reporting on sex and gender                                        | We performed sex-specific analyses of body composition change in period preceding pancreatic cancer diagnosis. Sex was self-reported by participants. We did not perform gender-specific analyses.                                |
| Reporting on race, ethnicity, or other socially relevant groupings | Race was self-reported. Only White and Black participants were included in this analysis since reference (or standardized) curves for muscle and adipose tissue measurements for other racial groups have not yet been developed. |
| Population characteristics                                         | Characteristics of case-control population used in this study are described in detail in Table 1.                                                                                                                                 |
| Recruitment                                                        | Participants (cases and controls) were recruited among patients seen at Dana-Farber Cancer Institute/Mass General Brigham (DFCI/MGB) and Kaiser Permanente Northern California (KPNC) care networks.                              |
| Ethics oversight                                                   | The current study was approved by Institutional Review Boards at Dana-Farber Cancer Institute, Mass General Brigham, and Kaiser Permanente Northern California.                                                                   |

Note that full information on the approval of the study protocol must also be provided in the manuscript.

## Field-specific reporting

Please select the one below that is the best fit for your research. If you are not sure, read the appropriate sections before making your selection.

Life sciences  Behavioural & social sciences  Ecological, evolutionary & environmental sciences

For a reference copy of the document with all sections, see [nature.com/documents/nr-reporting-summary-flat.pdf](https://www.nature.com/documents/nr-reporting-summary-flat.pdf)

## Life sciences study design

All studies must disclose on these points even when the disclosure is negative.

|                 |                                                                                                                                                                                                                                                                                                                                                                                                                                                                                                                                                                                                       |
|-----------------|-------------------------------------------------------------------------------------------------------------------------------------------------------------------------------------------------------------------------------------------------------------------------------------------------------------------------------------------------------------------------------------------------------------------------------------------------------------------------------------------------------------------------------------------------------------------------------------------------------|
| Sample size     | Population consisted of 714 pancreatic cancer cases and 1,748 matched controls. Number of cases was limited by availability of CT imaging in prediagnostic period (2 months to 5 years before diagnosis) and other exclusion criteria (indication for prediagnosis CT scan related to PDAC diagnosis, history of another cancer with unknown date of diagnosis or diagnosis <5 years before prediagnosis CT scan, and age, sex, and race-specific reference curves for tissue areas not available). Cases were then matched with 1 to 3 controls without pancreatic cancer with available CT imaging. |
| Data exclusions | Exclusion criteria for case-control population are described above. No data was excluded from the analysis.                                                                                                                                                                                                                                                                                                                                                                                                                                                                                           |
| Replication     | No external dataset was available for validation.                                                                                                                                                                                                                                                                                                                                                                                                                                                                                                                                                     |
| Randomization   | Not applicable. This study was observational and did not have experimental or treatment groups.                                                                                                                                                                                                                                                                                                                                                                                                                                                                                                       |
| Blinding        | Investigators were blinded to case-control status during image analysis and quantification of adipose and skeletal muscle tissues.                                                                                                                                                                                                                                                                                                                                                                                                                                                                    |

## Reporting for specific materials, systems and methods

We require information from authors about some types of materials, experimental systems and methods used in many studies. Here, indicate whether each material, system or method listed is relevant to your study. If you are not sure if a list item applies to your research, read the appropriate section before selecting a response.

### Materials & experimental systems

| n/a                                 | Involved in the study                                  |
|-------------------------------------|--------------------------------------------------------|
| <input checked="" type="checkbox"/> | <input type="checkbox"/> Antibodies                    |
| <input checked="" type="checkbox"/> | <input type="checkbox"/> Eukaryotic cell lines         |
| <input checked="" type="checkbox"/> | <input type="checkbox"/> Palaeontology and archaeology |
| <input checked="" type="checkbox"/> | <input type="checkbox"/> Animals and other organisms   |
| <input type="checkbox"/>            | <input checked="" type="checkbox"/> Clinical data      |
| <input checked="" type="checkbox"/> | <input type="checkbox"/> Dual use research of concern  |
| <input checked="" type="checkbox"/> | <input type="checkbox"/> Plants                        |

### Methods

| n/a                                 | Involved in the study                           |
|-------------------------------------|-------------------------------------------------|
| <input checked="" type="checkbox"/> | <input type="checkbox"/> ChIP-seq               |
| <input checked="" type="checkbox"/> | <input type="checkbox"/> Flow cytometry         |
| <input checked="" type="checkbox"/> | <input type="checkbox"/> MRI-based neuroimaging |

## Clinical data

---

Policy information about [clinical studies](#)

All manuscripts should comply with the ICMJE [guidelines for publication of clinical research](#) and a completed [CONSORT checklist](#) must be included with all submissions.

|                             |                                                                                                        |
|-----------------------------|--------------------------------------------------------------------------------------------------------|
| Clinical trial registration | <input type="text" value="N/A (not a clinical trial)"/>                                                |
| Study protocol              | <input type="text" value="N/A (not a clinical trial)"/>                                                |
| Data collection             | <input type="text" value="CT imaging, clinical and demographic data was collected from 2003 to 2017"/> |
| Outcomes                    | <input type="text" value="N/A (not a clinical trial)"/>                                                |
