# Supplementary material for: Adipose tissue and skeletal muscle wasting precede clinical diagnosis of pancreatic cancer
Source: Nat Commun. 2023 Jul 18;14:4317. doi: 10.1038/s41467-023-40024-3 (PMC10354105; doi:10.1038/s41467-023-40024-3)
Supplement: Supplementary file 1 — Supplementary Information [file 41467_2023_40024_MOESM1_ESM.pdf]

**Supplementary Table 1.** Characteristics of pancreatic cancer cases and matched controls at the time of prediagnosis CT imaging by study site

| Characteristic*                                                            | DFCI/MGB         |                     | KPNC             |                       |
|----------------------------------------------------------------------------|------------------|---------------------|------------------|-----------------------|
|                                                                            | Cases<br>(N=228) | Controls<br>(N=581) | Cases<br>(N=486) | Controls<br>(N=1,167) |
| Age, years**                                                               | 66.1 (10.9)      | 65.8 (11.1)         | 67.6 (9.7)       | 67.3 (9.9)            |
| Year of CT imaging**                                                       |                  |                     |                  |                       |
| 2003-2010                                                                  | 68 (30)          | 168 (29)            | 246 (51)         | 568 (49)              |
| 2011-2017                                                                  | 160 (70)         | 413 (71)            | 240 (49)         | 599 (51)              |
| Intravenous contrast with CT imaging **                                    | 161 (71)         | 409 (70)            | 402 (83)         | 1,000 (86)            |
| Female**                                                                   | 106 (46)         | 272 (47)            | 234 (48)         | 555 (48)              |
| Race**                                                                     |                  |                     |                  |                       |
| White                                                                      | 218 (96)         | 557 (96)            | 441 (91)         | 1,046 (90)            |
| Black                                                                      | 10 (4)           | 24 (4)              | 45 (9)           | 121 (10)              |
| Body mass index, kg/m <sup>2</sup> ***                                     | 29.6 (5.9)       | 28.8 (6.6)          | 29.2 (6.2)       | 29.0 (6.4)            |
| Diabetes                                                                   | 51 (22)          | 128 (22)            | 142 (29)         | 240 (21)              |
| Cigarette smoking                                                          |                  |                     |                  |                       |
| Never                                                                      | 92 (40)          | 244 (42)            | 184 (38)         | 528 (45)              |
| Past                                                                       | 98 (43)          | 262 (45)            | 144 (30)         | 412 (35)              |
| Current                                                                    | 37 (16)          | 73 (13)             | 82 (17)          | 126 (11)              |
| Unknown                                                                    | 1 (0.4)          | 2 (0.3)             | 76 (16)          | 101 (9)               |
| History of alcohol use                                                     |                  |                     |                  |                       |
| No/Unknown                                                                 | 201 (88)         | 515 (89)            | 437 (90)         | 1,076 (92)            |
| Yes                                                                        | 27 (12)          | 66 (11)             | 49 (10)          | 91 (8)                |
| Prior personal history of cancer before prediagnosis scan                  | 37 (16)          | 24 (4)              | 72 (15)          | 153 (13)              |
| Time from prior cancer to prediagnosis scan, years                         | 14.1 (9.8)       | 15.5 (9.4)          | 12.0 (6.5)       | 10.3 (5.7)            |
| Indication for CT scan                                                     |                  |                     |                  |                       |
| Symptoms/suspected conditions of the GI system                             | 51 (22)          | 131 (23)            | 57 (12)          | 83 (5)                |
| Symptoms/suspected conditions unrelated to the GI system                   | 62 (27)          | 239 (41)            | 102 (21)         | 468 (27)              |
| Systemic symptoms                                                          | 16 (7)           | 54 (9)              | 49 (10)          | 106 (9)               |
| New-onset diabetes                                                         | 0 (0)            | 0 (0)               | 4 (1)            | 6 (1)                 |
| Pain                                                                       | 103 (45)         | 327 (52)            | 262 (54)         | 624 (53)              |
| Other/unknown                                                              | 50 (22)          | 37 (6)              | 140 (29)         | 324 (28)              |
| Age at pancreatic cancer diagnosis, years                                  | 67.8 (11.0)      | NA                  | 70.1 (9.9)       | NA                    |
| Pancreatic cancer diagnosis period                                         |                  |                     |                  |                       |
| 2004-2008                                                                  | 21 (9)           | NA                  | 87 (18)          | NA                    |
| 2009-2013                                                                  | 74 (32)          | NA                  | 207 (43)         | NA                    |
| 2014-2018                                                                  | 133 (58)         | NA                  | 192 (40)         | NA                    |
| Pancreatic cancer stage at diagnosis                                       |                  |                     |                  |                       |
| Non metastatic                                                             | 132 (58)         | NA                  | 238 (49)         | NA                    |
| Metastatic                                                                 | 93 (41)          | NA                  | 233 (48)         | NA                    |
| Unknown                                                                    | 3 (1)            | NA                  | 15 (3)           | NA                    |
| Time from prediagnosis CT imaging to histopathological diagnosis, months   | 21.0 (15.9)      | NA                  | 23.6 (17.8)      | NA                    |
| Time from at diagnosis CT imaging to histopathological diagnosis, days**** | 8 (16)           | NA                  | 10 (14)          | NA                    |

\* Characteristics obtained at the time of the prediagnosis CT imaging study in cases and matched controls. Mean (standard deviation) for continuous variables and N (%) for categorical variables, unless noted otherwise.

\*\* Matching factors

\*\*\* Body mass index is unknown for 134 cases and 1 control in DFCI/MGB, and for 62 cases and 119 controls in KPNC.

\*\*\*\* Among 170 DFCI/MGB and 517 KPNC cases with available at diagnosis scan

Abbreviations: DFCI/MGB, Dana-Farber Cancer Institute/Mass General Brigham; KPNC, Kaiser Permanente Northern California

**Supplementary Figure 1.** Correlation between CA19-9 levels at diagnosis with weight and tissue change in prediagnostic period

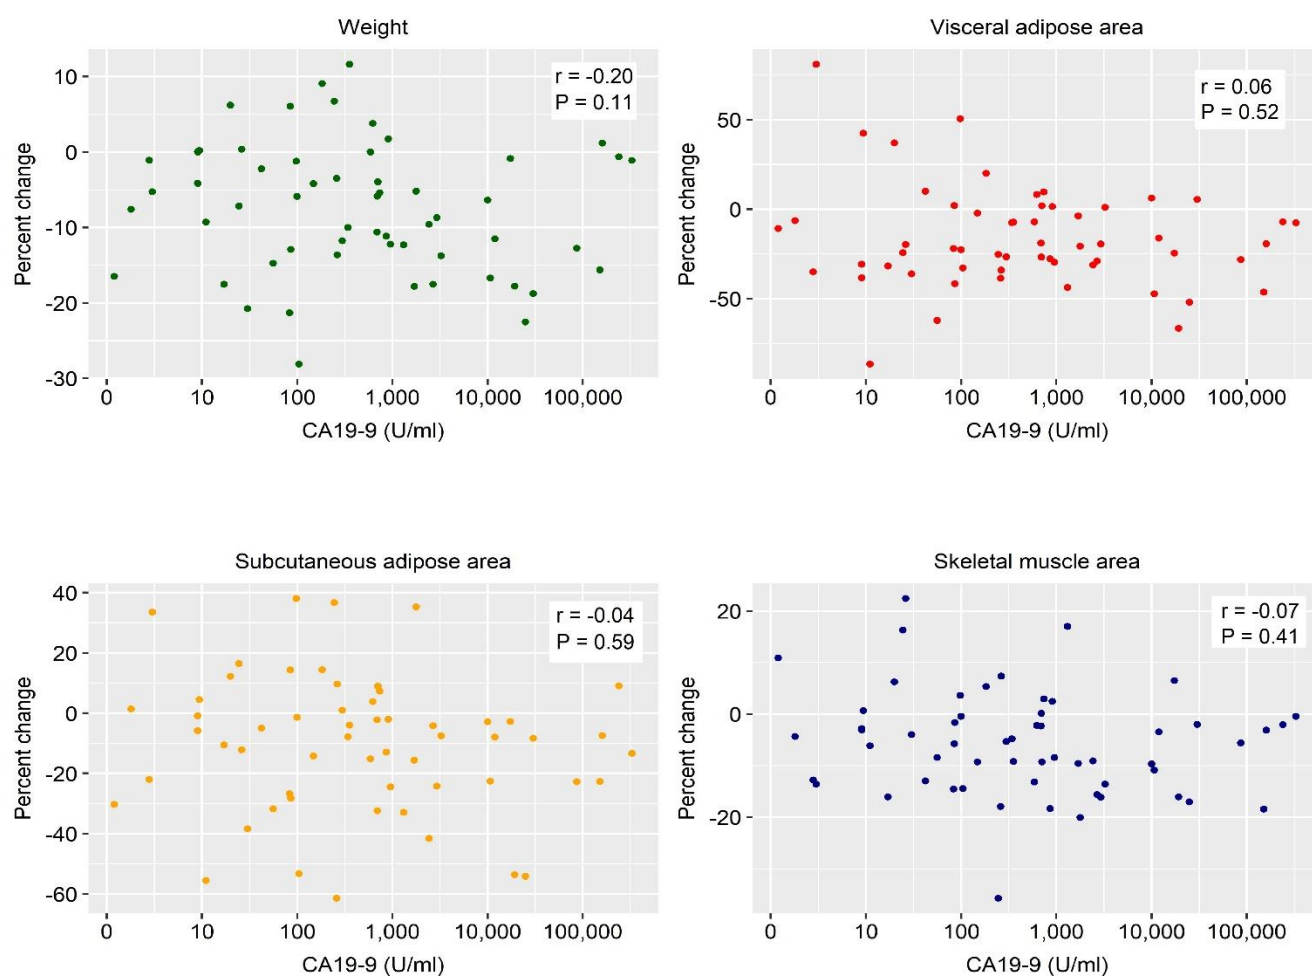

In white boxes are shown Spearman correlation coefficients ( $r$ ) and corresponding P-values. Source data are provided as a Source Data file.

**Supplementary Figure 2.** Correlation matrix for percent change in weight and tissue measurements between prediagnosis and at-diagnosis CT scans.

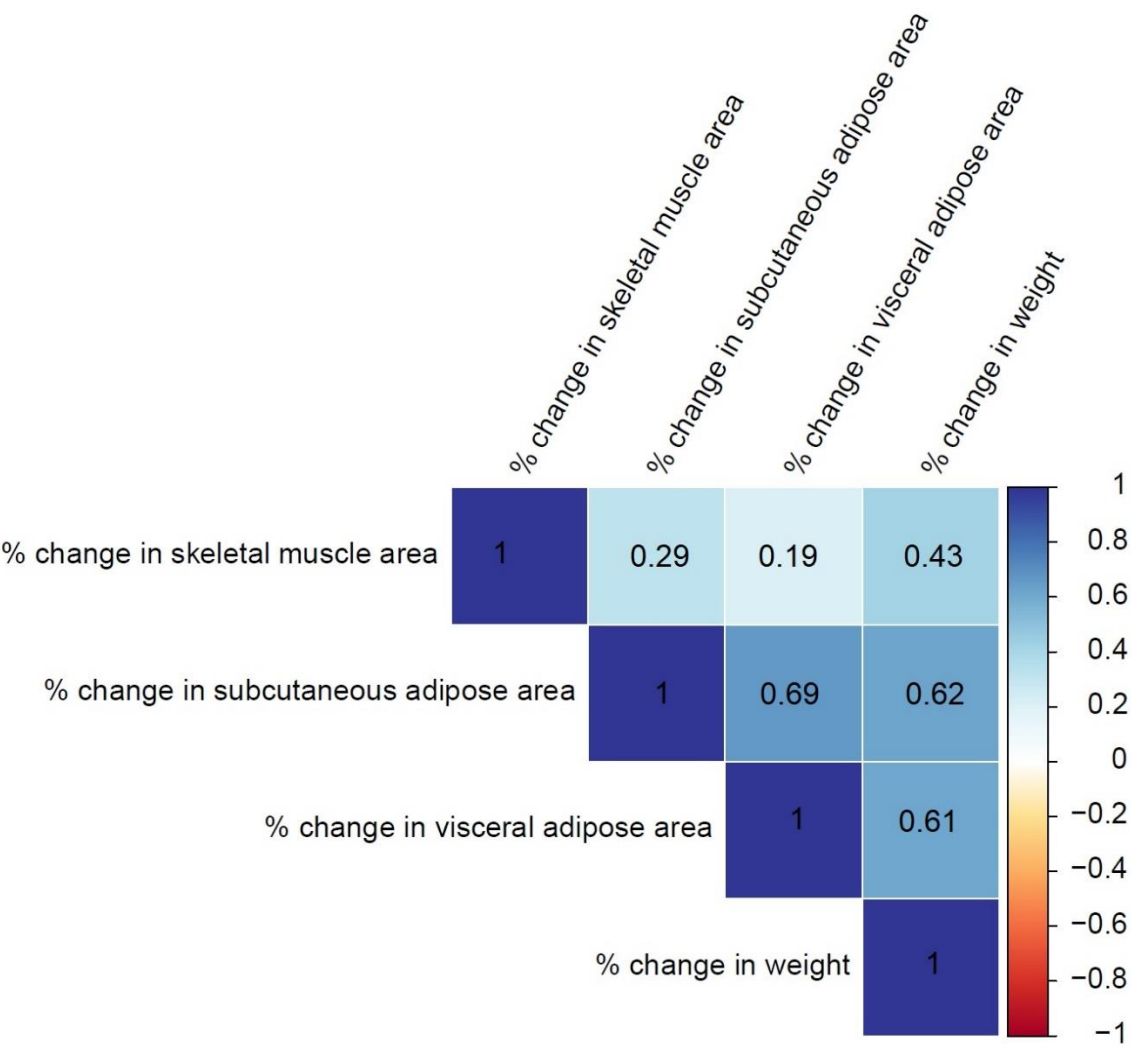

Legend: Color scale represents Spearman correlation coefficients for patients with complete data for tissue and weight change (N=386). Coefficient of correlation is shown for each pair of variables. Source data are provided as a Source Data file.
